# Supplementary material for: Estimating New Zealand’s harvested wood products carbon stocks and stock changes
Source: Carbon Balance Manag. 2020 May 21;15:10. doi: 10.1186/s13021-020-00144-5 (PMC7243304; doi:10.1186/s13021-020-00144-5)
Supplement: Supplementary file 1 — Additional file 1. Estimates of production and trade quantities from 1900 to 1960. [file 13021_2020_144_MOESM1_ESM.xlsx]

## Sheet: Sheet1
		PRODUCTION RAW						PRODUCTION HWPs							EXPORT RAW				EXPORT HWP						IMPORTS RAW					IMPORTS HWP
		Industrial Roundwood + (Total)	Other Indust Roundwd + (Total)	Mean density		Wood Pulp + (Total)		Sawnwood + (Total)		Plywood	Fibreboard + (Total)		Paper and Paperboard + (Total)		Industrial Roundwood + (Total)		Pulp		Sawnwood + (Total)		Fibreboard + (Total)		Paper and Paperboard + (Total)		Industrial Roundwood + (Total)	mean density		Pulp		Sawnwood + (Total)	mean density	Plywood	Fibreboard + (Total)		Paper and Paperboard + (Total)
		m3	m3	odt m-3		adt		m3		m3	m3		adt		m3		adt		m3	mean density	m3		adt		m3	odt m-3		adt		m3	odt m-3	m3	m3		adt
	1900	1237034	40128.7	0.46434				618517		6185.17	0		12370.3		0		0		135740	0.46434	0		0		14797.5	0.64		0		25593.8	0.55	0	0		7145.65
	1901	1.23467e+06	40052.1	0.466				617337		6173.37	0		12346.7		0		0		169501	0.466	0		0		15518.5	0.64		99.3091		29066.3	0.55	39.3443	0		7897.39
	1902	924260	29982.4	0.4657				462130		4621.3	0		9242.6		0		0		116234	0.4657	0		0		16239.5	0.64		198.618		32538.8	0.55	78.6885	0		8649.12
	1903	1.17961e+06	38265.9	0.4657				589806		5898.06	0		11796.1		0		0		134751	0.4657	0		0		16960.5	0.64		297.927		36011.3	0.55	118.033	0		9400.86
	1904	1.38617e+06	44966.7	0.469695				693087		6930.87	0		13861.7		0		0		142372	0.469695	0		0		17681.5	0.64		397.236		39483.7	0.55	157.377	0		10152.6
	1905	1.95073e+06	63280.5	0.4657				975364		9753.64	0		19507.3		0		0		177874	0.4657	0		0		17904.2	0.64		496.545		39503.7	0.55	196.721	0		11104.3
	1906	1.58814e+06	51518.4	0.4657				794071		7940.71	0		15881.4		0		0		178248	0.4657	0		0		18127	0.64		595.855		39523.7	0.55	236.066	0		12056
	1907	2.03919e+06	66150.1	0.465008				1.01959e+06		10195.9	0		20391.9		0		0		170284	0.465008	0		0		18349.7	0.64		695.164		39543.6	0.55	275.41	0		13007.8
	1908	2.34755e+06	76153	0.4582				1.17377e+06		11737.7	0		23475.5		0		0		199548	0.4582	0		0		18572.5	0.64		794.473		39563.6	0.55	314.754	0		13959.5
	1909	1.95346e+06	63369.1	0.4547				976731		9767.31	0		19534.6		0		0		168974	0.4547	0		0		18795.2	0.64		893.782		39583.6	0.55	354.098	0		14911.2
	1910	1.66507e+06	54013.9	0.4512				832534		8325.34	0		16650.7		0		0		193379	0.4512	0		0		19018	0.64		993.091		39603.5	0.55	393.443	0		15862.9
	1911	1.39728e+06	45326.8	0.4523				698638		6986.38	0		13972.8		0		0		203691	0.4523	0		0		19240.7	0.64		1092.4		39623.5	0.55	432.787	0		16814.6
	1912	1.53809e+06	49894.8	0.4521				769046		7690.46	0		15380.9		0		0		222913	0.4521	0		0		19463.5	0.64		1191.71		39643.5	0.55	472.131	0		17766.4
	1913	1.03962e+06	33724.6	0.4552				519808		5198.08	0		10396.2		0		0		149787	0.4552	0		0		19686.2	0.64		1291.02		39663.4	0.55	511.475	0		18718.1
	1914	1.37324e+06	44547.1	0.4572				686619		6866.19	0		13732.4		0		0		196689	0.4572	0		0		19909	0.64		1390.33		39683.4	0.55	550.82	0		19669.8
	1915	1.27293e+06	41293.1	0.4583				636464		6364.64	0		12729.3		0		0		181241	0.4583	0		0		20131.7	0.64		1489.64		39703.4	0.55	590.164	0		20621.5
	1916	1.18518e+06	38446.5	0.457325				592590		5925.9	0		11851.8		0		0		168747	0.457325	0		0		20354.5	0.64		1588.95		39723.3	0.55	629.508	0		21573.2
	1917	1.23618e+06	40101.1	0.457699				618092		6180.92	0		12361.8		0		0		168358	0.457699	0		0		20577.2	0.64		1688.25		39743.3	0.55	668.852	0		22525
	1918	1.36029e+06	44127.2	0.458152				680147		6801.47	0		13602.9		0		0		176841	0.458152	0		0		20800	0.64		1787.56		39763.3	0.55	708.197	0		23476.7
	1919	947842	30747.4	0.458712				473921		4739.21	0		9478.42		0		0		117355	0.458712	0		0		21022.7	0.64		1886.87		39783.2	0.55	747.541	0		24428.4
	1920	1.39774e+06	45342	0.457264				698872		6988.72	0		13977.4		0		0		164407	0.457264	0		0		21245.5	0.64		1986.18		39803.2	0.55	786.885	0		25380.1
	1921	1.8404e+06	59701.5	0.460952				726015		7260.15	529.507		14520.3		0		0		108330	0.460952	0		0		21468.2	0.64		2085.49		56880.6	0.55	826.23	83.1723		26331.9
	1922	1.88409e+06	61118.9	0.462449				743252		7432.52	1059.01		14865		0		0		104281	0.462449	0		0		21691	0.64		2184.8		73958	0.55	865.574	166.345		27283.6
	1923	1.82057e+06	59058.1	0.463588				718190		7181.9	1588.52		14363.8		0		0		112262	0.463588	0		0		21913.7	0.64		2284.11		107548	0.55	904.918	249.517		28235.3
	1924	1.89664e+06	61525.8	0.468404				748200		7482	2118.03		14964		0		0		101312	0.468404	0		0		22136.5	0.64		2383.42		141137	0.55	944.262	332.689		29187
	1925	2.0583e+06	66770	0.467265				811973		8119.73	2647.54		16239.5		0		0		116123	0.467265	0		0		22359.2	0.64		2482.73		168251	0.55	983.607	415.861		30138.7
	1926	1.43073e+06	46412.1	0.466383				833516		8335.16	3177.04		16670.3		0		0		95497.9	0.466383	0		0		22582	0.64		2582.04		154440	0.55	1022.95	499.034		31090.5
	1927	1.23813e+06	40164.4	0.465356				721313		7213.13	3706.55		14426.3		0		0		87668.8	0.465356	0		0		22804.7	0.64		2681.35		133121	0.55	1062.3	582.206		32042.2
	1928	1.09275e+06	35448.3	0.465782				636618		6366.18	4236.06		12732.4		0		0		82531	0.465782	0		0		23027.5	0.64		2780.65		134048	0.55	1101.64	665.378		32993.9
	1929	1.0945e+06	35505	0.466336				637635		6376.35	4765.56		12752.7		0		0		92282.7	0.466336	0		0		23250.2	0.64		2879.96		143954	0.55	1140.98	748.55		33945.6
	1930	1.14388e+06	37106.8	0.463271				666402		6664.02	5295.07		13328		0		0		62955.7	0.463271	0		0		23473	0.64		2979.27		139989	0.55	1180.33	831.723		34897.3
	1931	1.85173e+06	60069.1	0.454638				541484		5414.84	5824.58		10829.7		0		0		41376.2	0.454638	0		0		23695.7	0.64		3078.58		37492.9	0.55	1219.67	914.895		35849.1
	1932	1.24428e+06	40363.8	0.453312				363854		3638.54	6354.09		7277.08		0		0		64397	0.453312	0		0		23918.5	0.64		3177.89		16477.3	0.55	1259.02	998.067		36800.8
	1933	1.34174e+06	43525.2	0.456904				392352		3923.52	6883.59		7847.04		0		0		60957.4	0.456904	0		0		24141.2	0.64		3277.2		24208.2	0.55	1298.36	1081.24		37752.5
	1934	1.59501e+06	51741.2	0.459651				466414		4664.14	7413.1		9328.27		0		0		81491.5	0.459651	0		0		24364	0.64		3376.51		40070.7	0.55	1337.7	1164.41		38704.2
	1935	1.96724e+06	63816	0.463169				575261		5752.61	7942.61		11505.2		0		0		93421.1	0.463169	0		0		24586.7	0.64		3475.82		73685.2	0.55	1377.05	1247.58		39656
	1936	1.48922e+06	48309.6	0.466523				691000		6910	8472.12		13820		0		0		49544.3	0.466523	0		0		24809.5	0.64		3575.13		73807.9	0.55	1416.39	1330.76		40607.7
	1937	1.55388e+06	50406.9	0.467608				721000		7210	9001.62		14420		0		0		41670.5	0.467608	0		0		25032.2	0.64		3674.44		93101.1	0.55	1455.74	1413.93		41559.4
	1938	1.63578e+06	53063.6	0.46995				759000		7590	9531.13		15180		0		0		34300.8	0.46995	0		0		25254.9	0.64		3773.75		102014	0.55	1495.08	1497.1		42511.1
	1939	1.61207e+06	52294.6	0.470229				748000		7480	10060.6		14960		0		0		31086.7	0.470229	0		0		25477.7	0.64		3873.05		64076.3	0.55	1534.43	1580.27		43462.8
	1940	1.70905e+06	55440.6	0.468908		221		793000		7930	10590.1		13079		0		0		40882.3	0.468908	0		0		25700.4	0.64		3972.36		31926.9	0.55	1573.77	1663.45		44414.6
	1941	1.81303e+06	58813.6	0.467872		5975		807000		8070	11119.7		15904		0		0		44925.9	0.467872	0		0		25923.2	0.64		4071.67		29660	0.55	1613.11	1746.62		45366.3
	1942	1.71867e+06	55752.7	0.467795		7997		765000		7650	11649.2		18159		0		0		17558.3	0.467795	0		0		26145.9	0.64		4170.98		17170.9	0.55	1652.46	1829.79		46318
	1943	1.80854e+06	58667.9	0.463269		12881		805000		8050	12178.7		20830		0		0		10361.8	0.463269	0		0		26368.7	0.64		4270.29		25030.3	0.55	1691.8	1912.96		47269.7
	1944	1.85572e+06	60198.4	0.465078		15097		826000		8260	12708.2		19741		0		0		10034.8	0.465078	0		0		26591.4	0.64		4369.6		26928.6	0.55	1731.15	1996.13		48221.4
	1945	1.80404e+06	58522.1	0.463277		15681		803000		8030	13237.7		20949		0		0		9753.88	0.463277	0		0		26814.2	0.64		4468.91		31884.8	0.55	1770.49	2079.31		49173.2
	1946	1.96133e+06	63624.5	0.461419		17219		814000		9282	13767.2		18259		0		0		18856.4	0.461419	0		0		27036.9	0.64		4568.22		32439.3	0.55	1809.84	2162.48		50124.9
	1947	2.11456e+06	68594.9	0.46056		17124		834000		10166	15089.1		21283		0		0		20902.5	0.46056	0		0		27259.7	0.64		4667.53		51029.3	0.55	1849.18	2245.65		51076.6
	1948	2284000	74091.6	0.462689		18265		1015000		11271	16587.5		25372		0		0		53732.5	0.462689	0		0		64560.1	0.64		4766.84		41517.2	0.55	1888.52	2328.82		52028.3
	1949	2421000	78535.8	0.462604		21414		1110000		11492	19657.8		23135		0		0		59604.2	0.462604	0		0		44381.9	0.64		4866.15		62311.2	0.55	1927.87	2412		52980
	1950	2558000	82980	0.463398		21781		1131000		10873	21372		22136		0		0		35164	0.463398	0		0		32432.2	0.64		4965.45		46139.9	0.55	1967.21	2495.17		53931.8
	1951	2824000	91608.9	0.464035		24093		1244000		13746	23586		25259		0		0		50744.7	0.464035	0		0		22299.5	0.64		5064.76		50590.4	0.55	2006.56	2578.34		69975.2
	1952	3096000	100432	0.461339		25346		1359000		14542	26875		23629		0		0		39860.4	0.461339	0		0		39766.3	0.64		5164.07		92827.3	0.55	2045.9	2661.51		92262.1
	1953	3079000	99881	0.461783		27112		1352000		13614	27239		23684		0		0		48715.1	0.461783	0		0		31327.9	0.64		5263.38		79686	0.55	2085.25	2744.69		78782.1
	1954	3118000	101146	0.461119		45585		1350000		13658	42043		27812		0		19897.3		78588	0.461119	300		103.637		22889.5	0.64		5362.69		89434	0.55	2124.59	2827.86		65302
	1955	3455000	112078	0.45755		53016		1453000		14453	44685		40917		0		27779.8		101008	0.45755	300		680.753		28316.8	0.64		5462		119167	0.55	2163.93	2911.03		88185
	1956	3500000	113538	0.456753		79298		1477000		15779	42299		58297		0		48115		81892	0.456753	300		28504.3		42239.3	0.64		3637		109964	0.55	2203.28	2119.63		69066
	1957	3523000	114284	0.457774		172624		1406000		16708	47832		110002		0		66037.2		70564	0.457774	300		39584.3		58521.5	0.64		6835		149843	0.55	2242.62	1703.43		63066
	1958	3625000	117593	0.457157		190436		1407000		17150	46707		133088		31148.5		70069.9		94636	0.457157	300		45144.1		40115.5	0.64		8546		117751	0.55	2281.97	352.486		57870
	1959	3967000	128687	0.45553		215258		1501000		17680	46240		154072		141584		78059.1		120360	0.45553	300		48671.8		22653.5	0.64		8789		79051.2	0.55	2321.31	16.2232		55042
	1960	4615000	149708	0.454829		221408		1638000		19050	48453		164255		121762		71198.7		112336	0.454829	300		56234.3		31620.5	0.64		12054		105008	0.55	2360.66	202.642		62530
